# Supplementary material for: Tracking pre-mRNA maturation across subcellular compartments identifies developmental gene regulation through intron retention and nuclear anchoring
Source: HighWire-hosted journal article supplement (doi:10.1101/gr.273904.120), 2021-04-08
Supplement: Supplemental_Table_S5.1.xlsx [file Supplemental_Table_S5.1.xlsx]

## Sheet: Table S5.
Supplemental Table S5.
Number of introns exhibiting Co- or Posttranscriptional splicing.
(Related to Fig 2C and Supplemental Fig 4F)
	Cotranscriptional splicing	Posttranscriptional splicing
	Total_Chr_FI ≥ 0.1
	PolyA_Chr_FI < 0.1	PolyA_Chr_FI ≥ 0.1		Sum	Note
Unique Intron	34939	14753	Intron number	49692	Figure 2C and Supplemental Figure 4F
	70.3111	29.6889	(%)
Upstream I intron of SE	919	1860	Intron number	2779	Figure 2C
	33.0694	66.9306	(%)
Downstream I intron of SE	880	1864	Intron number	2744	Figure 2C
	32.07	67.93	(%)
Unique Intron_First Intron	544	217	Intron number	761	Supplemental Figure 4F
	71.4849	28.5151	(%)
Unique Intron_Middle Intron	525	267	Intron number	792	Supplemental Figure 4F
	66.2879	33.7121	(%)
Unique Intron_Last Intron	490	363	Intron number	853	Supplemental Figure 4F
	57.4443	42.5557	(%)
