# Supplementary figures and images for: Tracking pre-mRNA maturation across subcellular compartments identifies developmental gene regulation through intron retention and nuclear anchoring
Source: HighWire-hosted journal article supplement (doi:10.1101/gr.273904.120), 2021-04-08

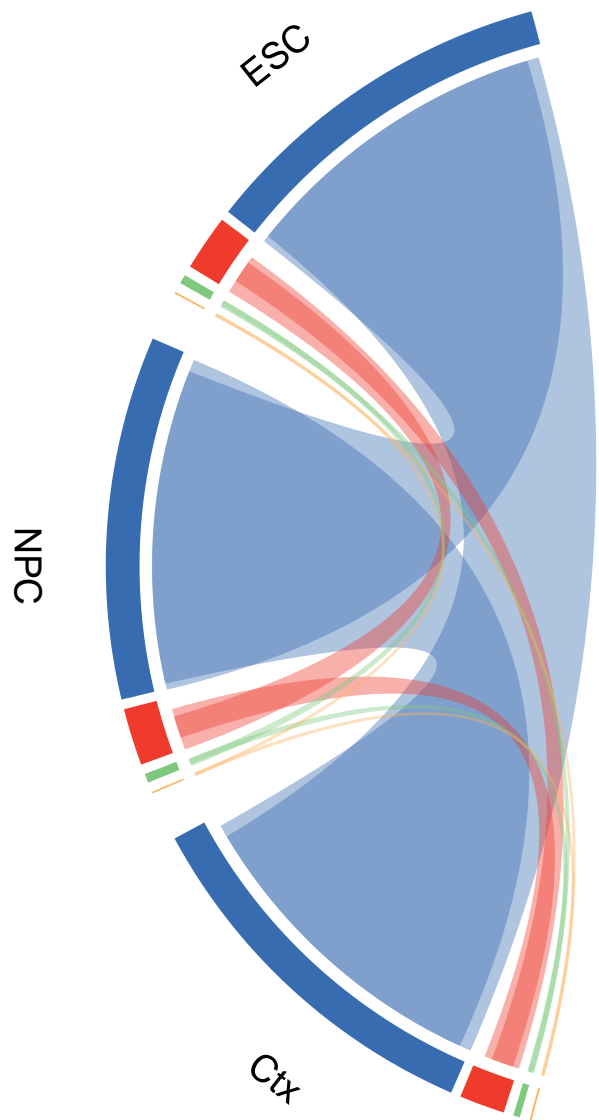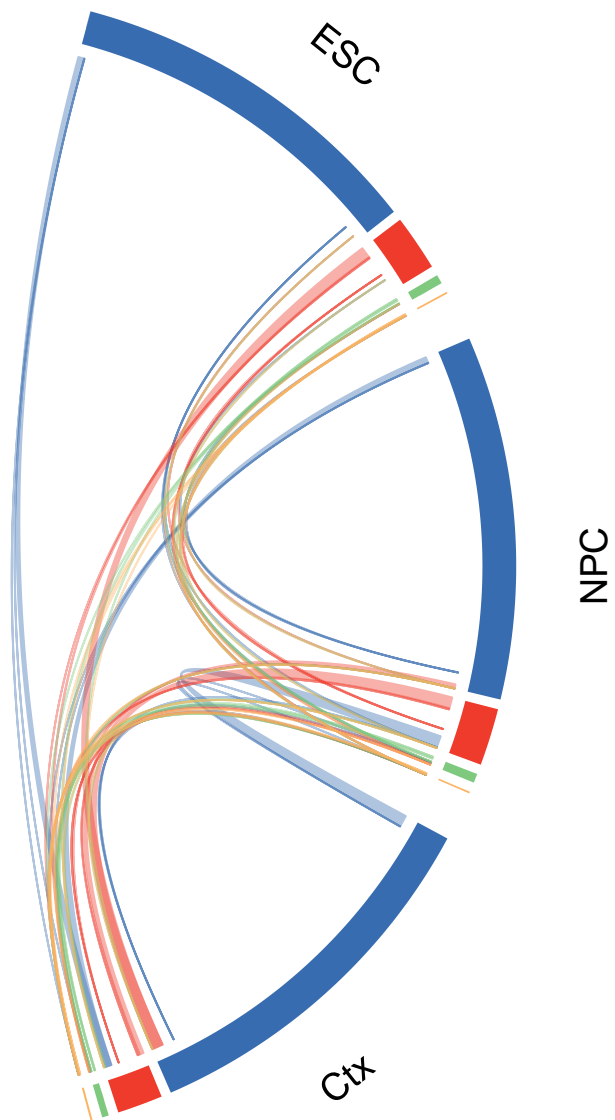

- A
- B
- C
- D

Supplement: Supplemental_Code_Mar012021.zip [file circos.pdf › intron-retention-paper-master/circos_plot_6/circos.pdf]

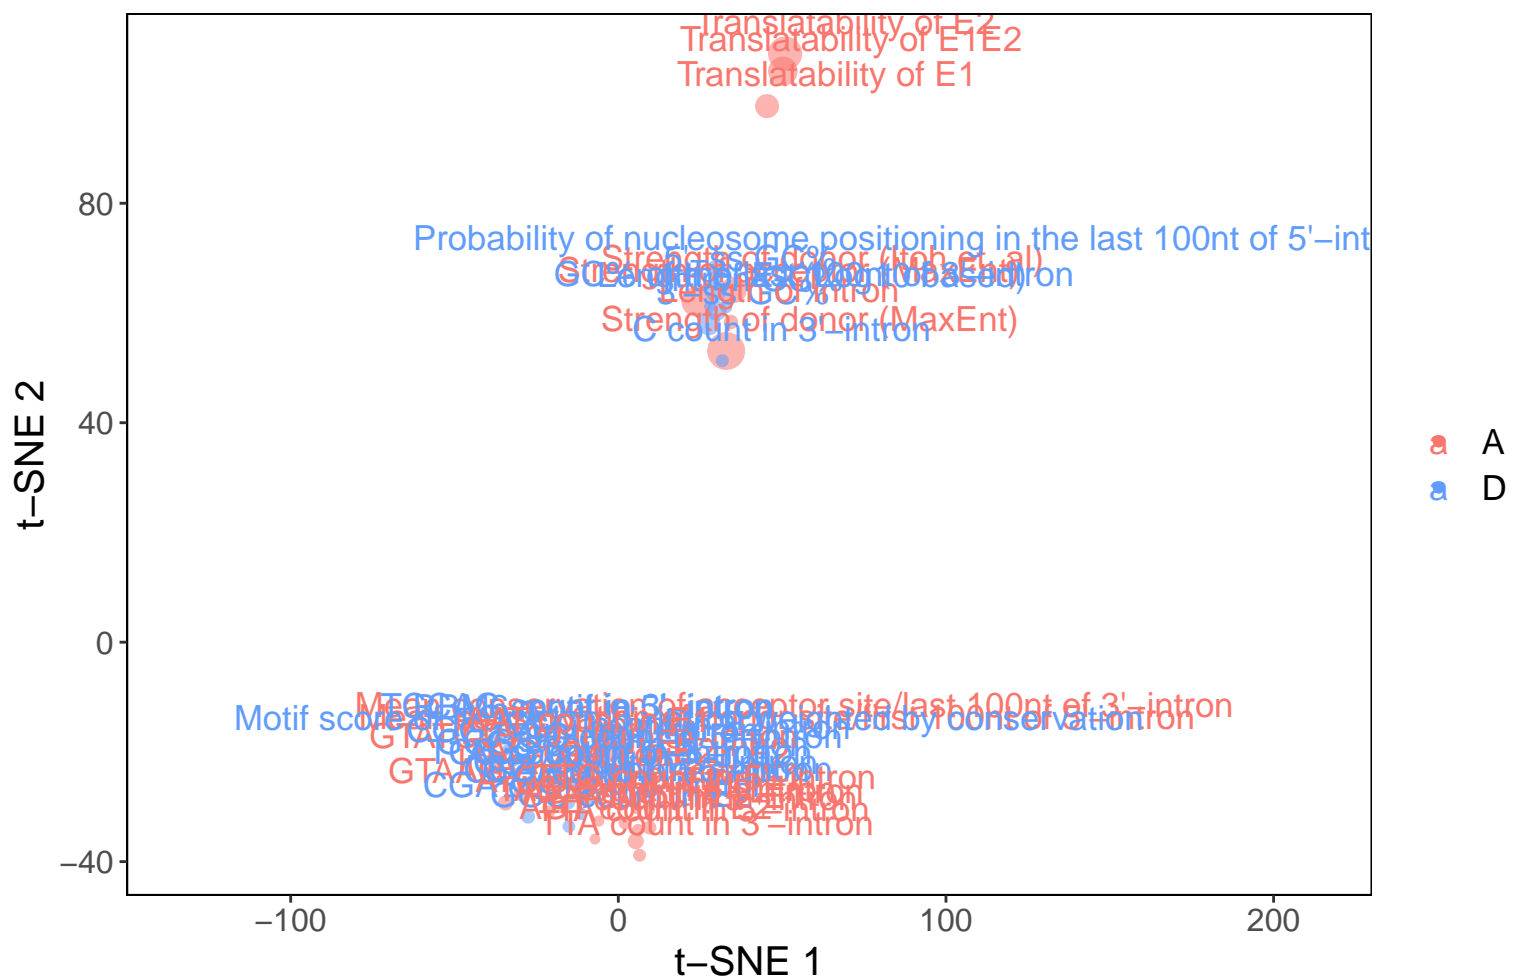

Supplement: Supplemental_Code_Mar012021.zip [file tsne_plot.pdf › intron-retention-paper-master/tsne_analysis_5/tsne_plot.pdf]
